# Supplementary material
Source: Springer Nature journal article supplement (https://www.springermedizin.de/resource/supplementary/13256_2011_1903_MOESM1_ESM.pdf/9648698)

A

O = R. Ear  
 AC X = L. Ear

O = R. Ear  
 BC X = L. Ear

DIAGNOSES:

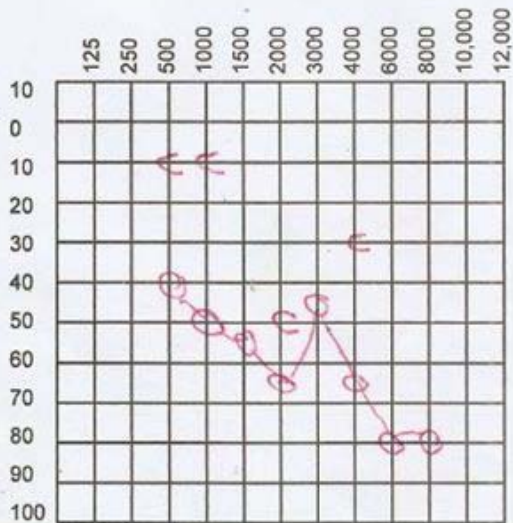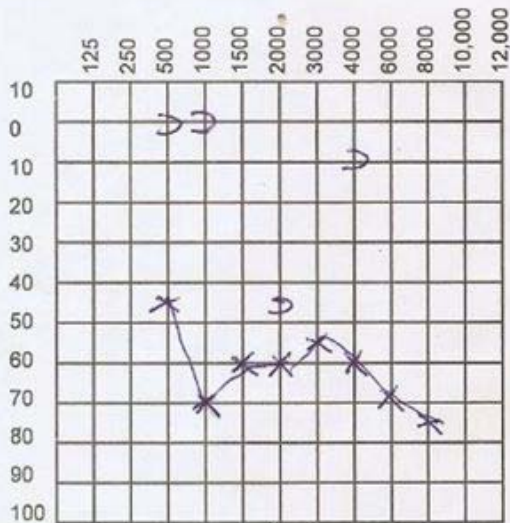

B

O = R. Ear  
 AC X = L. Ear

O = R. Ear  
 BC X = L. Ear

DIAGNOSES:

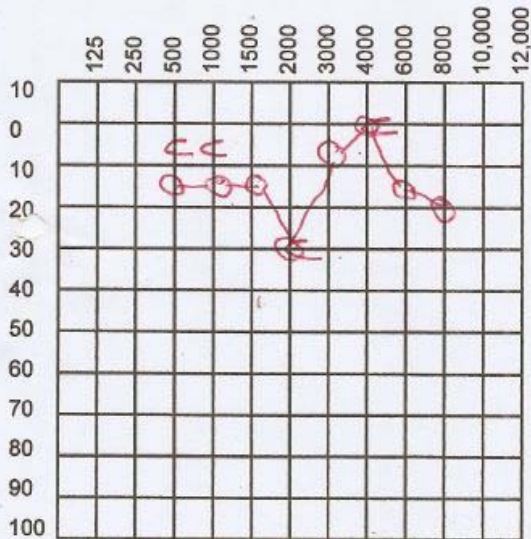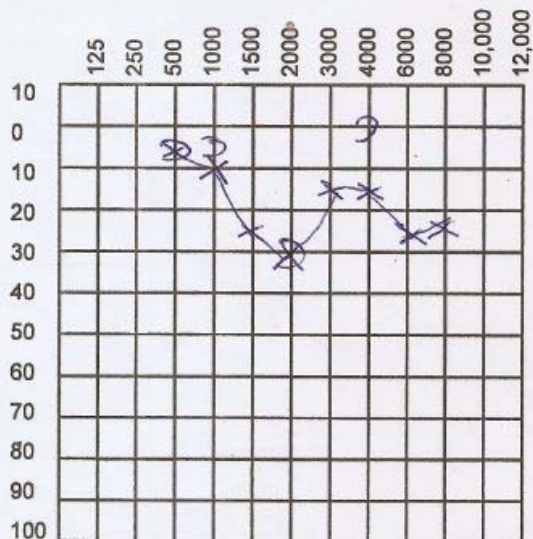

Supplement: MOESM1 [file 9648698]
